# Supplementary material
Source: Springer Nature journal article supplement (https://www.springermedizin.de/resource/supplementary/12889_2012_5657_MOESM1_ESM.pdf/9495896)

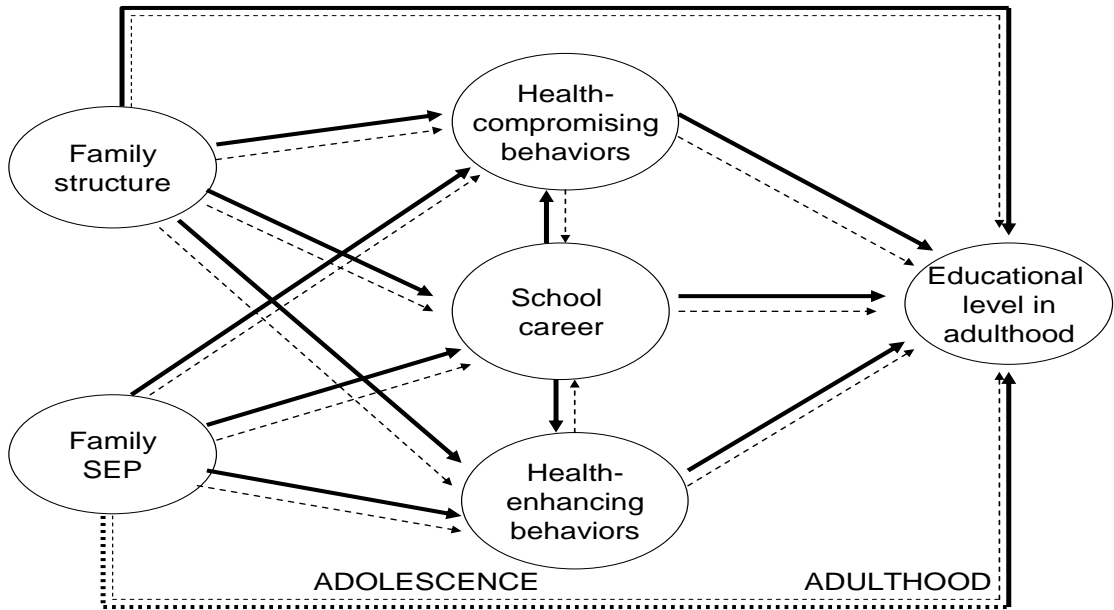

—————> Hypothesis 1 (through school career)  
 - - - - -> Hypothesis 2 (through health-related behaviors)

Supplement: MOESM1 [file 9495896]
